# Supplementary material for: A ratiometric fluorescent probe for detection of exogenous mitochondrial SO2 based on a FRET mechanism
Source: Royal Society of Chemistry journal article supplement (doi:10.1039/c8ra10328c), 2019-01-01
Supplement: c8ra10328c1.pdf [file c8ra10328c1.pdf]

## Supplementary data

### **A ratiometric fluorescent probe for detection of the endogenous mitochondrial SO<sub>2</sub> based on FRET mechanism**

Zhiyang Xu, Zhen Chen, Aikun Liu, Ruixue Ji, Xiaoqun Cao, Yanqing Ge\*

*School of Chemistry and Pharmaceutical Engineering, Taishan Medical University, Taian, Shandong 271016, P. R. China*

**Corresponding Author:** Yanqing Ge

E-mail address: [geyanqing2016@126.com](mailto:geyanqing2016@126.com)

Tel.: +86-538-6229741; Fax: +86-538-6229741

## Table of Contents:

|                                                                                                                                                                                   |           |
|-----------------------------------------------------------------------------------------------------------------------------------------------------------------------------------|-----------|
| <b>Fig. S1</b> Ultraviolet absorption spectra of <b>IPIN-SO<sub>2</sub></b> (10 $\mu$ M) with the addition of sulfite (0-30 equiv.) in 0.1M PBS (pH = 7.4) buffer solution.       | <b>S3</b> |
| <b>Fig. S2</b> Linearity between the fluorescence intensity ratio ( $F_{475}/F_{580}$ ) and the concentrations of $\text{SO}_3^{2-}$ in PBS (pH = 7.4) solution.                  | <b>S3</b> |
| <b>Fig. S3</b> The photostability of <b>IPIN-SO<sub>2</sub></b> in cells.                                                                                                         | <b>S4</b> |
| <b>Fig. S4</b> Cytotoxicity assays of <b>IPIN-SO<sub>2</sub></b> at different concentrations (1-16 $\mu$ M) for Glioma cells.                                                     | <b>S4</b> |
| <b>Fig. S5</b> Fluorescence images of Glioma cells incubated with <b>IPIN-SO<sub>2</sub></b> (0.1 $\mu$ M) and further incubated with $\text{Na}_2\text{SO}_3$ (0, 0.05, 0.5 mM). | <b>S5</b> |
| <b>Fig. S6</b> $^1\text{H}$ NMR spectrum of probe <b>IPIN-SO<sub>2</sub></b> .                                                                                                    | <b>S6</b> |
| <b>Fig. S7</b> $^{13}\text{C}$ NMR spectrum of probe <b>IPIN-SO<sub>2</sub></b> .                                                                                                 | <b>S6</b> |
| <b>Fig. S8</b> HRMS spectra of <b>IPIN-SO<sub>2</sub></b> (A) and <b>IPIN-SO<sub>2</sub></b> in the presence of $\text{Na}_2\text{SO}_3$ (B).                                     | <b>S7</b> |
| <b>Table S1</b> Comparison of ratiometric fluorescent probes for $\text{HSO}_3^-$                                                                                                 | <b>S8</b> |

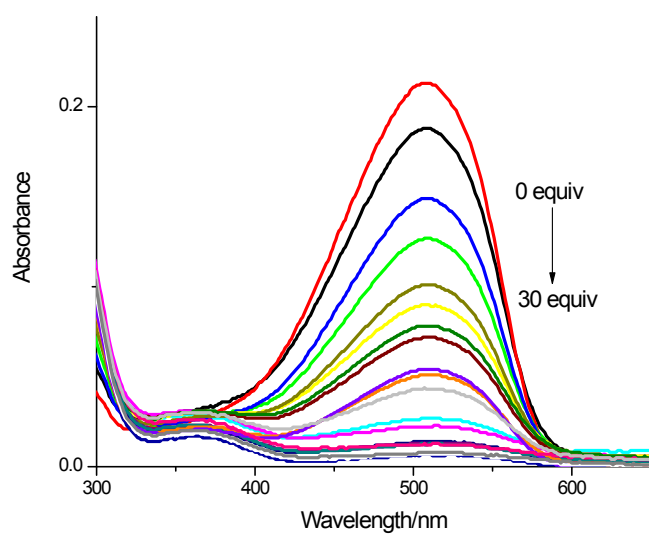

**Fig. S1** Ultraviolet absorption spectra of **IPIN-SO<sub>2</sub>** (10 μM) with the addition of sulfite (0-30 equiv.) in 0.1M PBS (pH = 7.4) buffer solution.

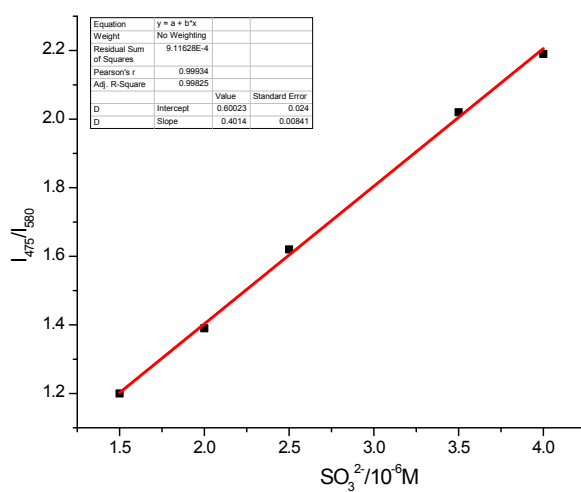

**Fig. S2** Linearity between the fluorescence intensity ratio ( $F_{475}/F_{580}$ ) and the concentrations of  $\text{SO}_3^{2-}$  in PBS (pH = 7.4) solution.

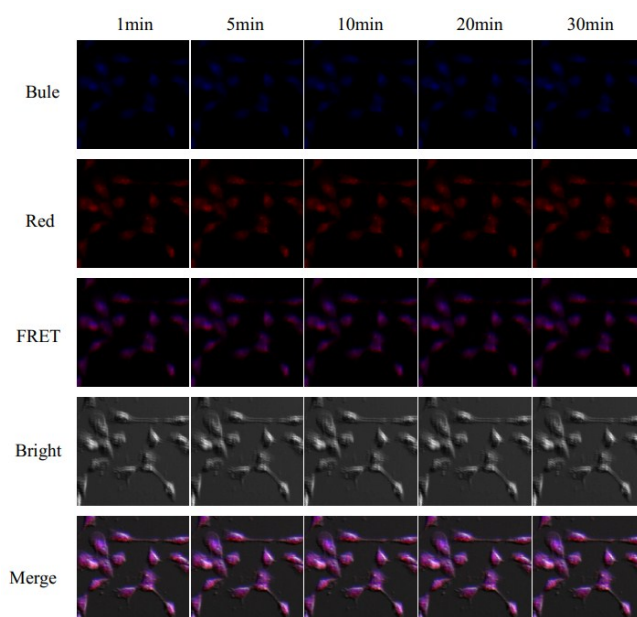

**Fig. S3** Photostability for fluorescent images of Glioma cells incubated with 0.1 $\mu$ M **IPIN-SO<sub>2</sub>** at 37°C. First row: fluorescence images from the blue channel (460/50 nm); second row: fluorescence images at the red channel (605/55 nm); third row: overlay images of the first and second rows; fourth row: bright field images; fifth row: overlay images of the first, second third and fourth rows.

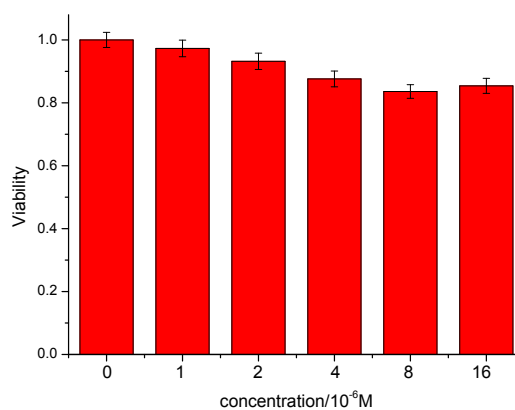

**Fig. S4** Cytotoxicity assays of **IPIN-SO<sub>2</sub>** at different concentrations (1-16  $\mu$ M) for Glioma cells.

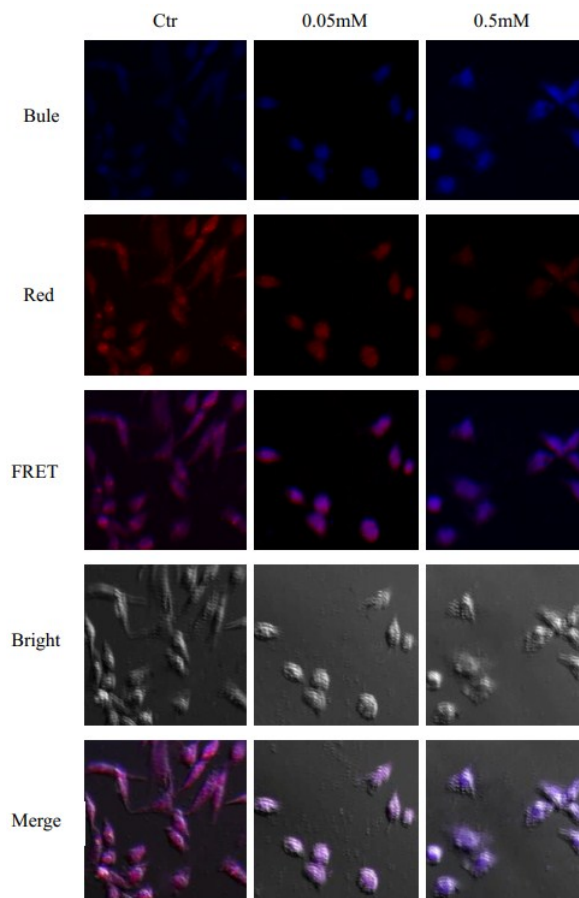

**Fig. S5** Fluorescence images of Glioma cells incubated with **IPIN-SO<sub>2</sub>** (0.1  $\mu$ M) for 60 min at 37 °C and further incubated with Na<sub>2</sub>SO<sub>3</sub> (0, 0.05, 0.5 mM) for 30 min at 37 °C. first row: fluorescence images from the blue channel (460/50 nm); second row: fluorescence images at the red channel (605/55 nm); third row: overlay images of the first and second rows; fourth row: bright field images; fifth row: overlay images of the first, second third and fourth rows.

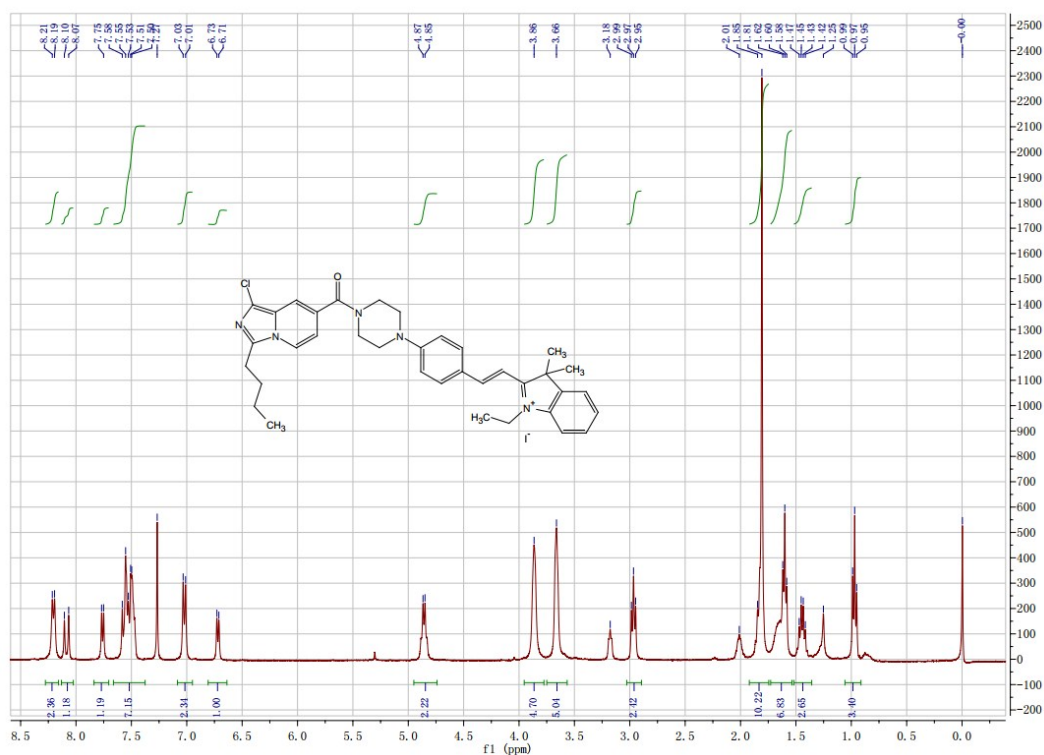

Fig. S6 <sup>1</sup>H NMR spectrum of probe IPIN-SO<sub>2</sub>.

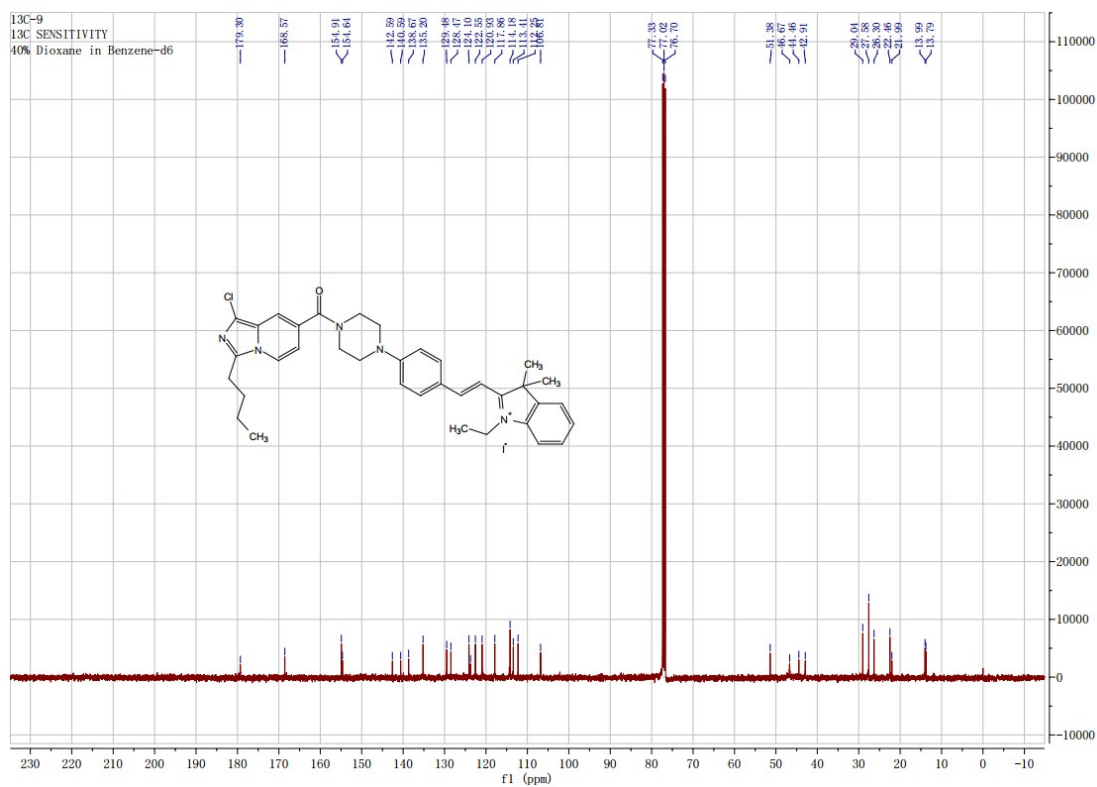

Fig. S7 <sup>13</sup>C NMR spectrum of probe IPIN-SO<sub>2</sub>.

|               |                     |             |        |                 |              |                        |                      |
|---------------|---------------------|-------------|--------|-----------------|--------------|------------------------|----------------------|
| Sample Name   | 180117-sample-6-1   | Position    | P1-D9  | Instrument Name | Instrument 1 | User Name              |                      |
| Inj Vol       | -1                  | InjPosition |        | SampleType      | Sample       | IRM Calibration Status | Success              |
| Data Filename | 180117-sample-6-1.d | ACQ Method  | 0103.m | Comment         |              | Acquired Time          | 1/17/2018 8:33:19 AM |

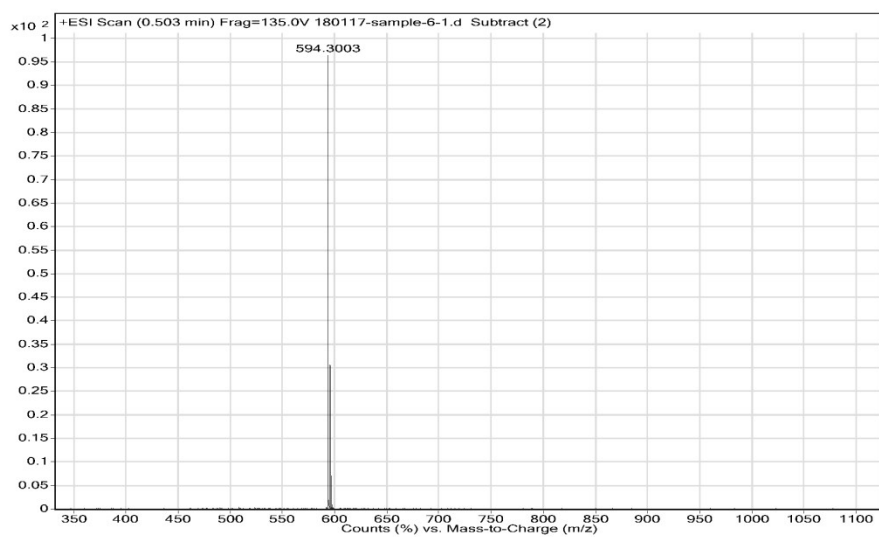

(A)

|               |                     |             |        |                 |              |                        |                      |
|---------------|---------------------|-------------|--------|-----------------|--------------|------------------------|----------------------|
| Sample Name   | 180117-sample-6-2   | Position    | P1-D8  | Instrument Name | Instrument 1 | User Name              |                      |
| Inj Vol       | -1                  | InjPosition |        | SampleType      | Sample       | IRM Calibration Status | Success              |
| Data Filename | 180117-sample-6-2.d | ACQ Method  | 0103.m | Comment         |              | Acquired Time          | 1/17/2018 9:23:35 AM |

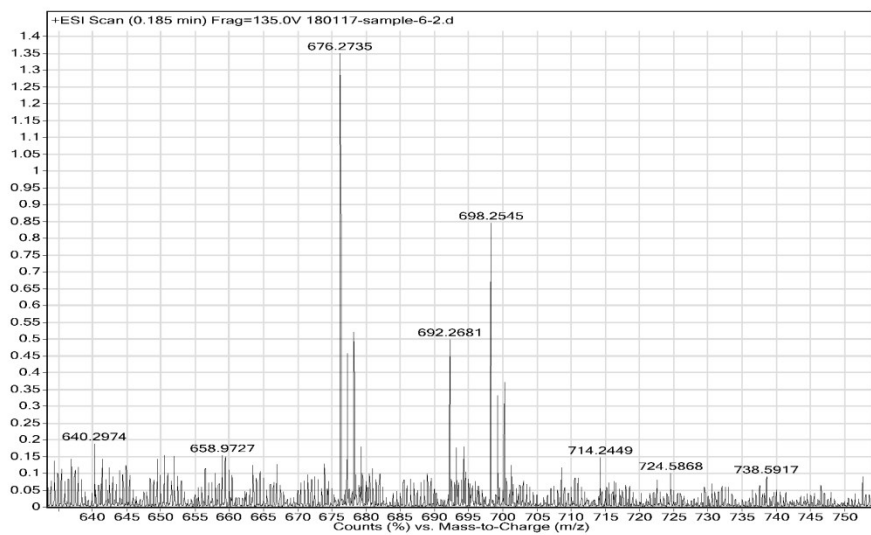

(B)

**Fig. S8** HRMS spectra of **IPIN-SO<sub>2</sub>** (A) and **IPIN-SO<sub>2</sub>** in the presence of **Na<sub>2</sub>SO<sub>3</sub>** (B).

Table S1 Comparison of ratiometric fluorescent probes for **HSO<sub>3</sub><sup>-</sup>**

| Structures                                                                          | $\lambda_{ex}/nm$ | $\lambda_{em}/nm$ | Detection limit | Response time | Ref.                                  |
|-------------------------------------------------------------------------------------|-------------------|-------------------|-----------------|---------------|---------------------------------------|
| 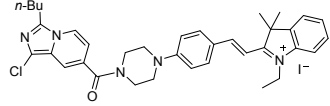   | 380               | 475/580           | 130 nM          | 180 s         | This Work                             |
|    | 380               | 477/576           | 70 nM           | 1200 s        | Dyes Pigments, 2019, 165, 212-216     |
|    | 380               | 465/640           | 62 nM           | 120 s         | RSC. Adv., 2019, 9, 1147-1150         |
|   | 380               | 470/578           | 26.7 nM         | 120 s         | Anal. Chim. Acta, 2019, 1053, 148-154 |
|  | 380               | 470/578           | 40 nM           | 120 s         | Anal. Chim. Acta, 2019, 1055, 133-139 |
|  | 466/580           | 523/663           | 0.27 nM         | 90s           | Chem. Commun., 2014, 50, 183          |
|  | 446               | 480/578           | 5800 nM         | 30s           | Analyst, 2013, 138, 3018              |
|  | 445               | 478/633           | 380 nM          | 300 s         | Chem. Commun., 2013, 49, 2637         |
|  | 405               | 480/650           | 90 nM           | 180s          | Biomaterials, 2015, 56, 1             |



|                                                                                     |         |         |        |                        |                                    |
|-------------------------------------------------------------------------------------|---------|---------|--------|------------------------|------------------------------------|
| 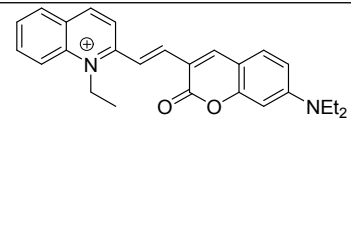   | 450     | 518/610 | 89 nM  | 900s                   | Org. Biomol. Chem., 2014, 12, 4637 |
|    | 450/550 | 485/667 | 27 nM  | --                     | Sens. Actuators, B, 2015, 211, 377 |
|    | 415/500 | 460/600 | 100 nM | --                     | Chem. – Asian J., 2014, 9, 1817    |
|   | 430/605 | 485/640 | 34 nM  | 300s                   | Sens. Actuators, B, 2015, 206, 268 |
|  | 415     | 485/605 | 53 nM  | 3600s                  | Anal. Chim. Acta, 2015, 888, 138   |
|  | 410     | 465/592 | 200 nM | $t_{1/2} \approx 300s$ | Anal. Chim. Acta, 2013, 788, 165   |
|  | 322/470 | 460/595 | 3.0 nM | 180s                   | Chem. Commun., 2015, 51, 1154      |
|  | 410     | 530/580 | 100 nM | 120s                   | Chem. Commun., 2016, 52, 2760      |
